# Supplementary material
Source: PubMed Central journal article supplement (PMC6246803)

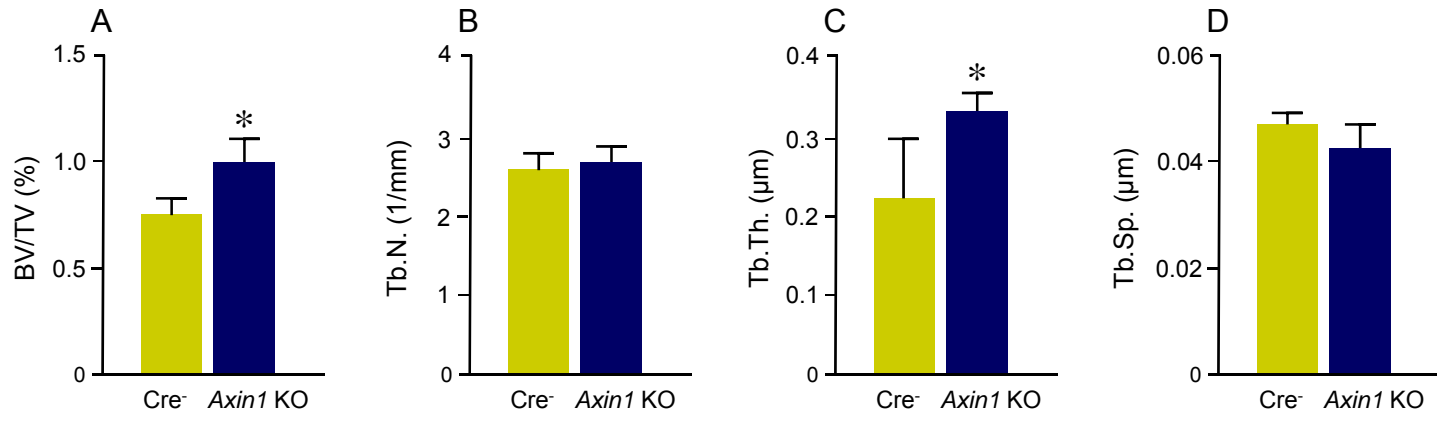

Figure S1

Supplement: NIHMS981615-supplement-Fig-S1.pdf [file NIHMS981615-supplement-Fig-S1.pdf]
